# Supplementary material for: Near-planar Solution Structures of Mannose-binding Lectin Oligomers Provide Insight on Activation of Lectin Pathway of Complement
Source: PubMed Central journal article supplement — J Biol Chem. 2011 Dec 13;287(6):3930–45. doi: 10.1074/jbc.M111.320341 (PMC3281675; doi:10.1074/jbc.m111.320341), 2011-12-13
Supplement: supp_M111.320341_MBL_supplementary.pdf [file supp_M111.320341_MBL_supplementary.pdf]

## SUPPLEMENTARY MATERIAL

### FIGURE S1. Outcome of the constrained modelling analyses of the MBL oligomers.

The  $R$ -factor values for the 900-6,859 trial models of the MBL oligomers are compared with the corresponding  $R_G$  values. The parameters for all the models are shown as open yellow circles. The vertical dashed lines correspond to the experimental  $R_G$  values obtained from the Guinier fit (black) and the  $P(r)$  analyses (blue). In all four panels the 10-12 best models are represented by blue circles (Tables 2 and 3). The best-fit model from each search is shown in red (Tables 2 and 3).

*A*, Fit search 1 for the MBL monomer, based on the swivel region. For this, the 5,000 models were created using a conformationally-randomised 70-DSRAIE-75 linker, starting from the linear MBL monomer model (Figure 5B).

*B*, Fit search 2 for the MBL dimer. In the starting model, two best-fit MBL monomers were aligned end-to-end, with the Gly29 residues on chain A in each monomer separated by 3.3 nm. In this search, 6,859 rotational models were created by holding monomer 1 stationary and rotating monomer 2 in 19 steps of  $10^\circ$  between  $0^\circ$  and  $180^\circ$  about the X-, Y- and Z-axes.

*C*, Fit search 2 for the MBL trimer. Three best-fit MBL monomer structures were superimposed upon one another, then 2028 trimer models were created by holding monomer 1 stationary and rotating monomers 2 and 3 at  $10^\circ$  steps between  $10^\circ$  and  $120^\circ$  and between  $20^\circ$  and  $240^\circ$  respectively about the X-, Y- and Z-axes.

*D*, The fit search for the MBL tetramer. Four best-fit MBL monomer structures were superimposed upon one another, and 900 models were generated by keeping monomer 1 at  $0^\circ$ ,  $0^\circ$ ,  $0^\circ$ , about the X-, Y- and Z-axes and rotating monomers 2, 3, and 4 at  $10^\circ$  increments between  $10^\circ$  and  $90^\circ$ ,  $20^\circ$  and  $180^\circ$  and  $30^\circ$  and  $270^\circ$ , respectively.

### FIGURE S2. Superimposition of the randomised and best-fit models of MBL oligomers.

In the eight panels, the best-fit model is shown in pink. The other models are shown in purple, or green. In panels *A*, *C*, *E* and *G*, two orthogonal views are shown, indicated by the labelled arrows. The 10-12 best-fit models from each analysis are provided in Supplementary Material.

*A-B*, Superimposition of the first 100 of the 5,000 models created in Search 1 for the MBL monomer. The models assessed the relative orientation of the CRD and neck region in relation to the collagen region in panel *A*. The best-fit 12 models from Search 1 are shown in panel *B* (Table 2).

*C-D*, Every 66<sup>th</sup> model of the 6,859 models created in Search 2 for the MBL dimer was superimposed for panel *C*. The best-fit 12 models from this search are superimposed onto monomer 1 (at the right) in panel *D*, indicating the range of possible positions for monomer 2.

*E-F*, Every 36<sup>th</sup> model of the 2,028 models created in Search 2 for the MBL trimer are superimposed for panel *E*. The 12 best-fit models from this search are superimposed using monomer 1 (at the right) in panel *F*. The conformations of two symmetry-related trimer models are shown in purple and green for clarity.

*G-H*, Every 18<sup>th</sup> model of the 900 created in the MBL tetramer search are superimposed in panel *G*. The best-fit 10 models were superimposed using monomer 1 (at the left) in panel *H*.

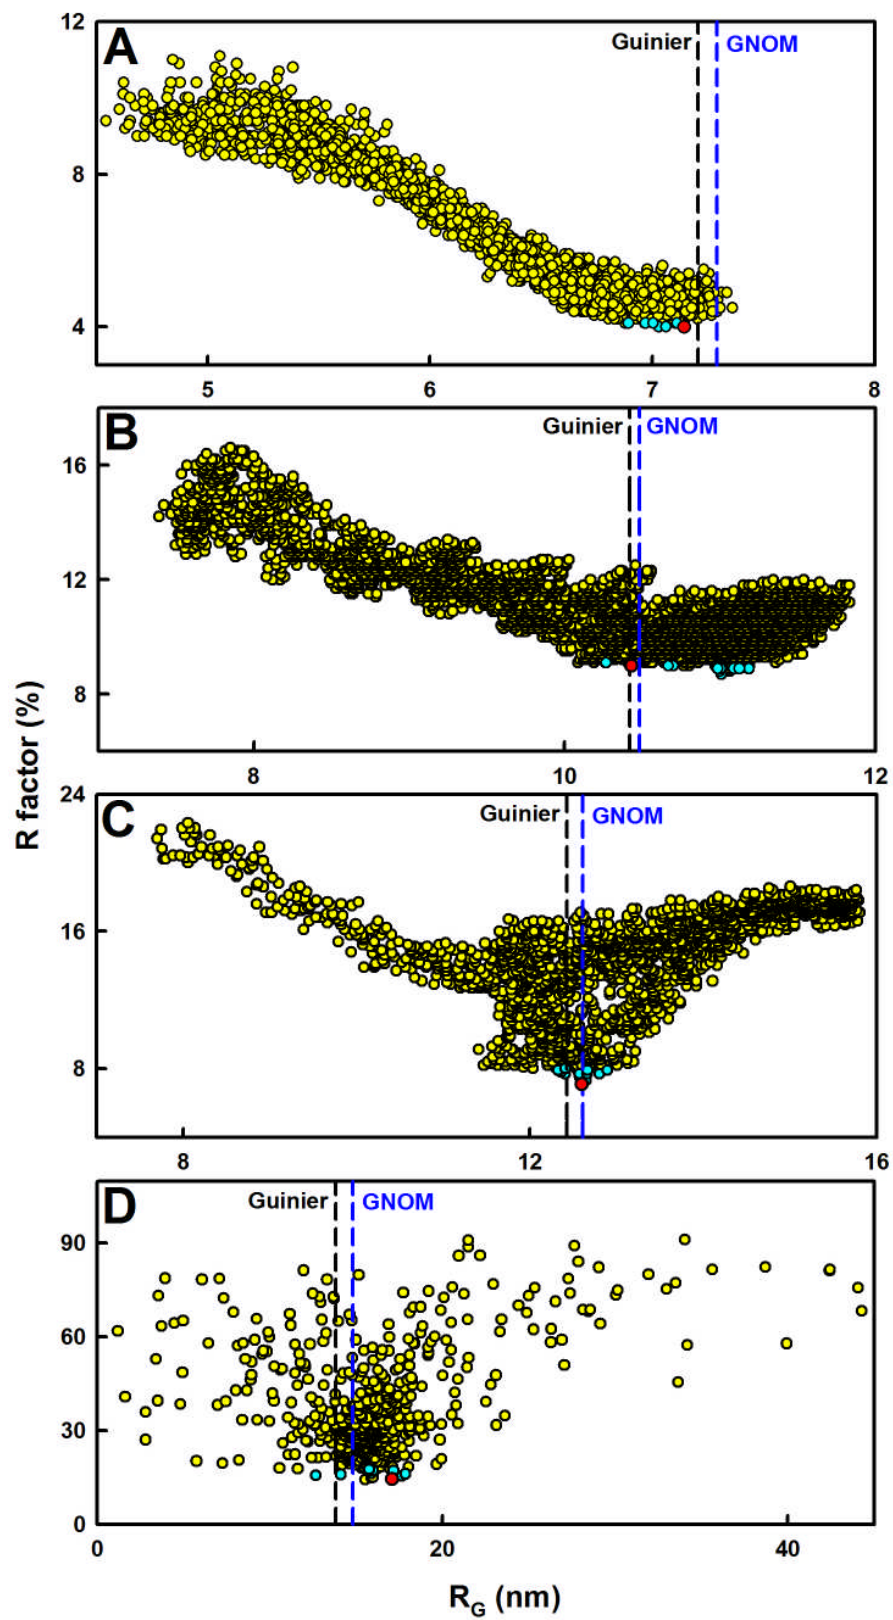

Figure S1

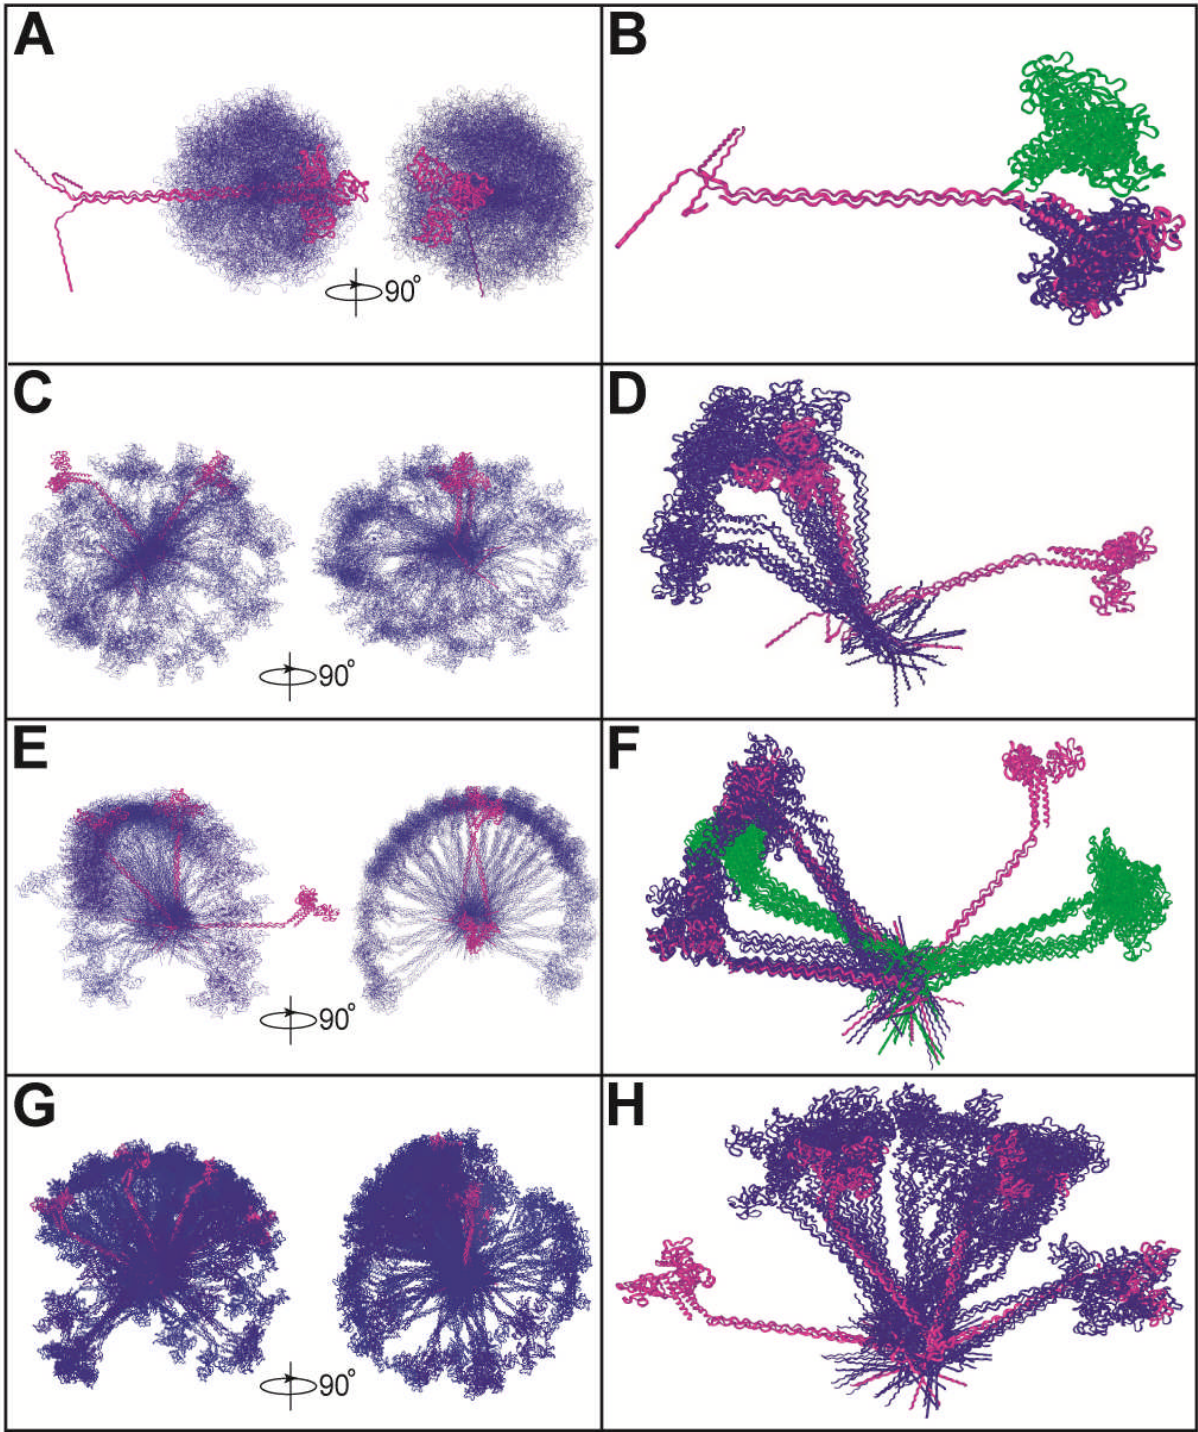

**Figure S2**
